---

# Contents

---

|                                                                                                                                                                                                                                                                           |     |
|---------------------------------------------------------------------------------------------------------------------------------------------------------------------------------------------------------------------------------------------------------------------------|-----|
| Preface<br><i>Sir Liam Donaldson</i>                                                                                                                                                                                                                                      | i3  |
| An overview of the Specialist Advisory Committee on Antimicrobial Resistance (SACAR)<br><i>Richard Wise</i>                                                                                                                                                               | i5  |
| Report of the Prescribing Subgroup of the Specialist Advisory Committee on Antimicrobial Resistance (SACAR)<br><i>Jonathan Cooke on behalf of the Prescribing Subgroup of SACAR</i>                                                                                       | i9  |
| The use of antibacterials in children: a report of the Specialist Advisory Committee on Antimicrobial Resistance (SACAR) Paediatric Subgroup<br><i>Mike Sharland on behalf of the SACAR Paediatric Subgroup</i>                                                           | i15 |
| Professional education on antimicrobial prescribing: a report from the Specialist Advisory Committee on Antimicrobial Resistance (SACAR) Professional Education Subgroup<br><i>Peter Davey and Sarah Garner on behalf of the Professional Education Subgroup of SACAR</i> | i27 |
| Report of the Specialist Advisory Committee on Antimicrobial Resistance (SACAR) Surveillance Subgroup<br><i>Andrew C. Hayward, Kim Goldsmith and Anne M. Johnson on behalf of the Surveillance Subgroup of SACAR</i>                                                      | i33 |
| Antibacterial prescribing in primary care<br><i>Irene Petersen and Andrew C. Hayward on behalf of the SACAR Surveillance Subgroup</i>                                                                                                                                     | i43 |
| The state of play in the battle against antimicrobial resistance: a general practitioner perspective<br><i>Douglas M. Fleming</i>                                                                                                                                         | i49 |
| Public education—a progress report<br><i>Mark Woodhead and Roger Finch on behalf of the Public Education Subgroup of SACAR</i>                                                                                                                                            | i53 |
| The priorities for antiviral drug resistance surveillance and research<br><i>Deenan Pillay</i>                                                                                                                                                                            | i57 |
| The zeitgeist of resistance<br><i>David Livermore</i>                                                                                                                                                                                                                     | i59 |
| The public's attitudes to and compliance with antibiotics<br><i>Clodna A. M. McNulty, Paul Boyle, Tom Nichols, Peter Clappison and Peter Davey</i>                                                                                                                        | i63 |
| The Scottish approach to enhancing antimicrobial stewardship<br><i>Dilip Nathwani and Peter Christie</i>                                                                                                                                                                  | i69 |
| Antibiotic pharmacists in the ascendancy<br><i>Kieran Hand</i>                                                                                                                                                                                                            | i73 |
| Antimicrobials and animal health: a fascinating nexus<br><i>Lord Soulsby</i>                                                                                                                                                                                              | i77 |
| Innovation—drugs and diagnostics<br><i>Roger Finch</i>                                                                                                                                                                                                                    | i79 |
| Appendix 1 SACAR Members                                                                                                                                                                                                                                                  | i83 |
| Appendix 2 Specialist Advisory Committee on Antimicrobial Resistance (SACAR) Antimicrobial Framework                                                                                                                                                                      | i87 |
